# Supplementary material for: Transcriptional Landscape of 3D vs. 2D Ovarian Cancer Cell Models
Source: MDPI journal article supplement (doi:10.3390/cancers15133350), 2023-06-26
Supplement: s1 [file cancers-2125248-supplementary.pdf › cancers-2125248-supplementary.pdf]

# Transcriptional landscape of 3D vs 2D ovarian cancer cell models

Rachel Kerslake<sup>1</sup>, Birhanu Belay<sup>2</sup>, Suzana Panfilov<sup>1</sup>, Marcia Hall<sup>1,3</sup>, Ioannis Kyrrou<sup>4,5,6,7,8</sup>, Harpal S. Randeva<sup>4,5</sup>, Jari Hyttinen<sup>2</sup>, Emmanouil Karteris<sup>1\*†</sup> and Cristina Sisu<sup>1\*†</sup>

## Supplementary Materials

**Table S1.** Cell line information and associated accession codes.

| Accession Number | SRA code   | Cell line | Subtype   | Condition | Scaffold |
|------------------|------------|-----------|-----------|-----------|----------|
| PRJNA472611      | SRR7204219 | A1847     | Carcinoma | 3D        | Agarose  |
|                  | SRR7204220 | A1847     | Carcinoma | 2D        | /        |
|                  | SRR7204221 | A2780     | HGSOC     | 3D        | Agarose  |
|                  | SRR7204222 | A2780     | HGSOC     | 2D        | /        |
|                  | SRR7204223 | OVCAR3    | HGSOC     | 3D        | Agarose  |
|                  | SRR7204224 | OVCAR3    | HGSOC     | 2D        | /        |
|                  | SRR7204225 | OVCAR4    | HGSOC     | 3D        | Agarose  |
|                  | SRR7204226 | OVCAR4    | HGSOC     | 2D        | /        |
|                  | SRR7204227 | OVCAR5    | HGSOC     | 3D        | Agarose  |
|                  | SRR7204228 | OVCAR5    | HGSOC     | 2D        | /        |
|                  | SRR7204231 | OVCAR10   | HGSOC     | 3D        | Agarose  |
|                  | SRR7204232 | OVCAR10   | HGSOC     | 2D        | /        |
|                  | SRR7204233 | OVCAR8    | HGSOC     | 3D        | Agarose  |
|                  | SRR7204234 | OVCAR8    | HGSOC     | 2D        | /        |
|                  | SRR7204235 | SKOV-3    | HGSOC     | 3D        | Agarose  |
|                  | SRR7204236 | SKOV-3    | HGSOC     | 2D        | /        |
|                  | SRR7204237 | PEO1      | HGSOC     | 3D        | Agarose  |
|                  | SRR7204238 | PEO1      | HGSOC     | 2D        | /        |
|                  | SRR7204229 | C30       | Carcinoma | 3D        | Agarose  |
|                  | SRR7204230 | C30       | Carcinoma | 2D        | /        |
|                  | SRR7204242 | C70       | Carcinoma | 3D        | Agarose  |
|                  | SRR7204241 | C70       | Carcinoma | 2D        | /        |
|                  | SRR7204240 | UPN275    | MAC       | 3D        | Agarose  |
|                  | SRR7204239 | UPN275    | MAC       | 2D        | /        |
| PRJNA530150      | SRR8823257 | OVCAR8    | HGSOC     | 2D        | /        |
|                  | SRR8823258 | OVCAR8    | HGSOC     | 2D        | /        |
|                  | SRR8823259 | OVCAR8    | HGSOC     | 2D        | /        |
|                  | SRR8823260 | OVCAR8    | HGSOC     | 2D        | /        |
|                  | SRR8823265 | OVCAR8    | HGSOC     | 3D        | Matrigel |

|             |             |           |       |    |                |
|-------------|-------------|-----------|-------|----|----------------|
| PRJNA564843 | SRR8823266  | OVCAR8    | HGSOC | 3D | Matrigel       |
|             | SRR8823267  | OVCAR8    | HGSOC | 3D | Matrigel       |
|             | SRR8823268  | OVCAR8    | HGSOC | 3D | Matrigel       |
|             | SRR8823273  | OVCAR8    | HGSOC | 2D | /              |
|             | SRR8823273  | OVCAR8    | HGSOC | 2D | /              |
|             | SRR8823273  | OVCAR8    | HGSOC | 2D | /              |
|             | SRR8823273  | OVCAR8    | HGSOC | 2D | /              |
|             | SRR8823280  | OVCAR8    | HGSOC | 3D | Matrigel       |
|             | SRR8823281  | OVCAR8    | HGSOC | 3D | Matrigel       |
|             | SRR8823282  | OVCAR8    | HGSOC | 3D | Matrigel       |
|             | SRR8823283  | OVCAR8    | HGSOC | 3D | Matrigel       |
|             | SRR10096845 | OVCAR8    | HGSOC | 2D | /              |
|             | SRR10096844 | OVCAR8    | HGSOC | 2D | /              |
|             | SRR10096843 | OVCAR8    | HGSOC | 2D | /              |
|             | SRR10096841 | OVCAR8    | HGSOC | 3D | Collagen       |
|             | SRR10096842 | OVCAR8    | HGSOC | 3D | Collagen       |
|             | SRR10096840 | OVCAR8    | HGSOC | 3D | Collagen       |
|             | SRR10096839 | OVCAR4    | HGSOC | 2D | /              |
|             | SRR10096838 | OVCAR4    | HGSOC | 2D | /              |
|             | SRR10096837 | OVCAR4    | HGSOC | 2D | /              |
|             | SRR10096836 | OVCAR4    | HGSOC | 3D | Collagen       |
|             | SRR10096835 | OVCAR4    | HGSOC | 3D | Collagen       |
|             | SRR10096834 | OVCAR4    | HGSOC | 3D | Collagen       |
|             | SRR10096828 | Kuramochi | HGSOC | 3D | Collagen       |
|             | SRR10096829 | Kuramochi | HGSOC | 3D | Collagen       |
|             | SRR10096830 | Kuramochi | HGSOC | 3D | Collagen       |
|             | SRR10096831 | Kuramochi | HGSOC | 2D | /              |
|             | SRR10096832 | Kuramochi | HGSOC | 2D | /              |
|             | SRR10096833 | Kuramochi | HGSOC | 2D | /              |
| PRJNA232817 | GSM1300206  | IGROV-1   | EAC   | 2D | /              |
|             | GSM1300207  | IGROV-1   | EAC   | 2D | /              |
|             | GSM1300208  | IGROV-1   | EAC   | 2D | /              |
|             | GSM1300209  | IGROV-1   | EAC   | 3D | Low Attachment |
|             | GSM1300210  | IGROV-1   | EAC   | 3D | Low Attachment |
|             | GSM1300211  | IGROV-1   | EAC   | 3D | Low Attachment |
| PRJNA318768 | GSM2125384  | HEY       | HGSOC | 2D | /              |
|             | GSM2125385  | HEY       | HGSOC | 2D | /              |
|             | GSM2125386  | HEY       | HGSOC | 2D | /              |
|             | GSM2125387  | HEY       | HGSOC | 2D | /              |

---

|            |     |       |    |              |
|------------|-----|-------|----|--------------|
| GSM2125388 | HEY | HGSOC | 3D | Hanging drop |
| GSM2125389 | HEY | HGSOC | 3D | Hanging drop |
| GSM2125390 | HEY | HGSOC | 3D | Hanging drop |
| GSM2125391 | HEY | HGSOC | 3D | Hanging drop |

---

**Table S2.** A) Top 150 differentially expressed genes in OVCAR8 in all three grown media: grown on agarose, collagen, Matrigel. The differential expression in each of the growth media is with respect to 2D controls of the OVCAR8;

| OVCAR8 v 2D controls |          |          |        |          |            |
|----------------------|----------|----------|--------|----------|------------|
| ACTB                 | CD70     | EVL      | LAPTM5 | PAX8     | SLPI       |
| ADAMTS1              | CDH13    | FAM83A   | LAYN   | PDCD10   | SNCA       |
| ADAMTS6              | CDH2     | FBN2     | LDHB   | PDE1C    | SNRPN      |
| AEBP1                | CDKN2A   | FGFBP1   | MAP1B  | PDPN     | SPAG4      |
| AJAP1                | CFB      | FN1      | MFSD2B | PHYHD1   | SPANXB1    |
| ALDOC                | CLGN     | GFRA1    | MGMT   | PI3      | SPINT2     |
| ANGPTL4              | CLMP     | GGT1     | MMP1   | PLIN2    | SRGN       |
| ANPEP                | COL3A1   | GREM1    | MSLN   | PLTP     | ST20-MTHFS |
| ANXA8L1              | COL7A1   | GSTM3    | MT1M   | PPP1R14A | STMN3      |
| ARMCX2               | CRIP1    | HBQ1     | MTAP   | PRAME    | SUN3       |
| B4GALNT4             | CTCFL    | HCLS1    | MX1    | PTGDS    | TENM2      |
| BCAT1                | CTSF     | HLA-DRB1 | MYEF2  | PTK7     | TFPI2      |
| BCL2A1               | CXCL1    | HSPB2    | NACA2  | PTPRS    | TGFBI      |
| BEX1                 | CXCL2    | IFI27    | NDN    | RFTN1    | THBS1      |
| BEX4                 | CXCL5    | IFI44    | NDRG1  | RPL7     | TRIM58     |
| BGN                  | CXCL8    | IFI44L   | NEFH   | RSPO4    | TSPAN1     |
| BHLHE40              | DDIT4    | IFI6     | NETO2  | SAA1     | TSPYL5     |
| BNIP3                | DKK 1.00 | IFITM1   | NEURL1 | SCOC     | TUSC3      |
| BST2                 | DUSP23   | IGFBP2   | NMRAL1 | SDC2     | TYMP       |
| C3                   | DZIP1    | IGFBP3   | NNMT   | SEMA3C   | UBB        |
| C3orf14              | EDARADD  | IGFN1    | NPPB   | SERPINB2 | UCHL1      |
| CALB1                | EFEMP2   | IL1A     | NPW    | SLC38A5  | UCP2       |
| CALB2                | EGR1     | IL1B     | NRG1   | SLC39A4  | ZNF699     |
| CCL2                 | ELOVL2   | IL6      | OAS3   | SLC6A15  | ZNF83      |
| CCL20                | ESM1     | LAMC2    | P3H2   | SLFN11   | ZSCAN18    |

**Table S2.** B) Top 150 differentially expressed genes across the cell lines A1847, A2780, C30, C70, OVCAR3, OVCAR4, OVCAR5, OVCAR8, OVCAR10, PEO1, SKOV-3, UPN275 grown on agarose vs. 2D controls

| Differentially expressed genes in Agarose vs 2D controls |          |        |         |          |            |
|----------------------------------------------------------|----------|--------|---------|----------|------------|
| ADAMTS1                                                  | COL26A1  | FOXD1  | KLK8    | NUPR1    | SPANXB1    |
| ADAMTS6                                                  | CP       | GALNT3 | KRT19   | PAX8     | SPARC      |
| ADGRG6                                                   | CRB3     | GBP1   | KRT23   | PDCD10   | SPINT2     |
| AKT3                                                     | CXCL1    | GBP2   | KRTCAP3 | PLAT     | SPON1      |
| ANPEP                                                    | CXCL2    | GDF15  | LAD1    | PLIN2    | SPP1       |
| ATP2B2                                                   | CXCL8    | GJB2   | LAMA3   | PLTP     | ST14       |
| AXL                                                      | CYGB     | GLDC   | LAMC2   | PPP1R14A | ST6GALNAC1 |
| BEX1                                                     | CYP1A1   | GLUL   | LCN2    | PRAME    | TACSTD2    |
| BMP7                                                     | DKK 1.00 | GNPMB  | LCP1    | PROM1    | TAGLN      |
| BST2                                                     | ECM1     | GSTM3  | LDHB    | PRSS22   | TFPI2      |
| C3                                                       | EDN2     | HGD    | LGALS13 | PTGS1    | TGFBI      |
| CALB2                                                    | EHD2     | IDO1   | LGR5    | RAB25    | TMC4       |
| CBLC                                                     | ELF3     | IGFBP2 | LY6K    | S100A14  | TMPRSS4    |
| CCL2                                                     | EMX2     | IGFBP3 | MACROD2 | S100A9   | TNFRSF6B   |
| CCL20                                                    | EPS8L1   | IGFBP5 | MAL2    | SCGB2A1  | TRIML2     |
| CD70                                                     | ERP27    | IGFBP7 | MECOM   | SCOC     | TSPAN1     |
| CD74                                                     | ESRP1    | IL1B   | MMP1    | SDC2     | TSTD1      |
| CDH1                                                     | EYA2     | IL1R1  | MMP7    | SGIP1    | TUSC3      |
| CDH6                                                     | FABP6    | IL1R2  | MPZL2   | SLC17A9  | UBB        |
| CDKN2A                                                   | FAM83A   | IL6    | MUC16   | SLC34A2  | UCHL1      |
| CHI3L1                                                   | FAT2     | IL7R   | NCAM1   | SLC38A5  | UQCRH      |
| CLDN11                                                   | FKBP10   | ITGB6  | NETO2   | SLC39A4  | UQCRHL     |
| CLDN4                                                    | FLNC     | KCNC3  | NPPB    | SLPI     | VTGN1      |
| COL18A1                                                  | FN1      | KISS1  | NPTX2   | SNRPN    | WFDC2      |
| COL23A1                                                  | FOSL1    | KLK10  | NRCAM   | SOX17    | WNT7A      |

**Table S2.** C) Top 150 differentially expressed genes in the cell lines Kuramochi, OVCAR4, and OVCAR8, grown on collagen vs. 2D controls or the respective cell lines.

| Top 150 differentially expressed genes in Collagen vs 2D controls |          |         |         |          |            |
|-------------------------------------------------------------------|----------|---------|---------|----------|------------|
| A2M                                                               | COL3A1   | GNGT2   | LAMA3   | OXTR     | SOX17      |
| ABI3                                                              | CP       | GOLIM4  | LCN2    | PDCD10   | SPARC      |
| ADGRG1                                                            | CRB3     | ID4     | LEMD1   | PKP3     | SPON1      |
| AFAP1L2                                                           | CTCF     | IFI27   | LGALS13 | PLPP2    | SPP1       |
| AKT3                                                              | CYGB     | IFI44   | LGR5    | PRSS22   | ST14       |
| APOE                                                              | DAPL1    | IFI44L  | LGR6    | PTGS1    | ST6GALNAC1 |
| ARID4A                                                            | DCDC2    | IFI6    | LIPG    | RAB25    | STRA6      |
| BAALC                                                             | DKK 1.00 | IFITM1  | LRRN2   | RAPGEF3  | SULF1      |
| BHLHE41                                                           | DPEP3    | IGF2    | LY6K    | REC8     | SYNE4      |
| BMP7                                                              | EDN2     | IGFBP2  | LYPD1   | RHOD     | TACSTD2    |
| BOC                                                               | ELF3     | IGFBP5  | MAL2    | RNF212   | TFPI2      |
| C3                                                                | EMX2     | IGFBP7  | MECOM   | S100A1   | TGFBI      |
| CBLC                                                              | EPB41L3  | IGFL1   | MLPH    | S100A14  | THY1       |
| CCDC146                                                           | EPCAM    | IL18    | MMP7    | S100A4   | TMC4       |
| CCL2                                                              | EPS8L1   | IL1R2   | MPZL2   | S100A9   | TNC        |
| CDA                                                               | ESRP1    | IL7R    | MUC16   | SC5D     | TNFRSF6B   |
| CDH1                                                              | FABP3    | ITGB3   | MX1     | SCGB2A1  | TRIM58     |
| CDH6                                                              | FBXO2    | ITGB6   | MX2     | SELENBP1 | TSPYL5     |
| CFI                                                               | FKBP10   | KCNC3   | MYH7B   | SFN      | TSTD1      |
| CLDN16                                                            | FLNC     | KISS1   | NDN     | SFTA2    | TUSC3      |
| CLDN4                                                             | FN1      | KLK8    | NEFH    | SLC17A9  | UBB        |
| CLDN7                                                             | FOXD1    | KRT19   | NKAIN4  | SLC34A2  | UQCRH      |
| CNTN1                                                             | FXYD6    | KRT7    | NPTX2   | SLC38A5  | UQCRHL     |
| COL1A2                                                            | GDF15    | KRTCAP3 | NRCAM   | SLPI     | WFDC2      |
| COL26A1                                                           | GLUL     | LAD1    | NXPH2   | SMIM22   | WNT7A      |

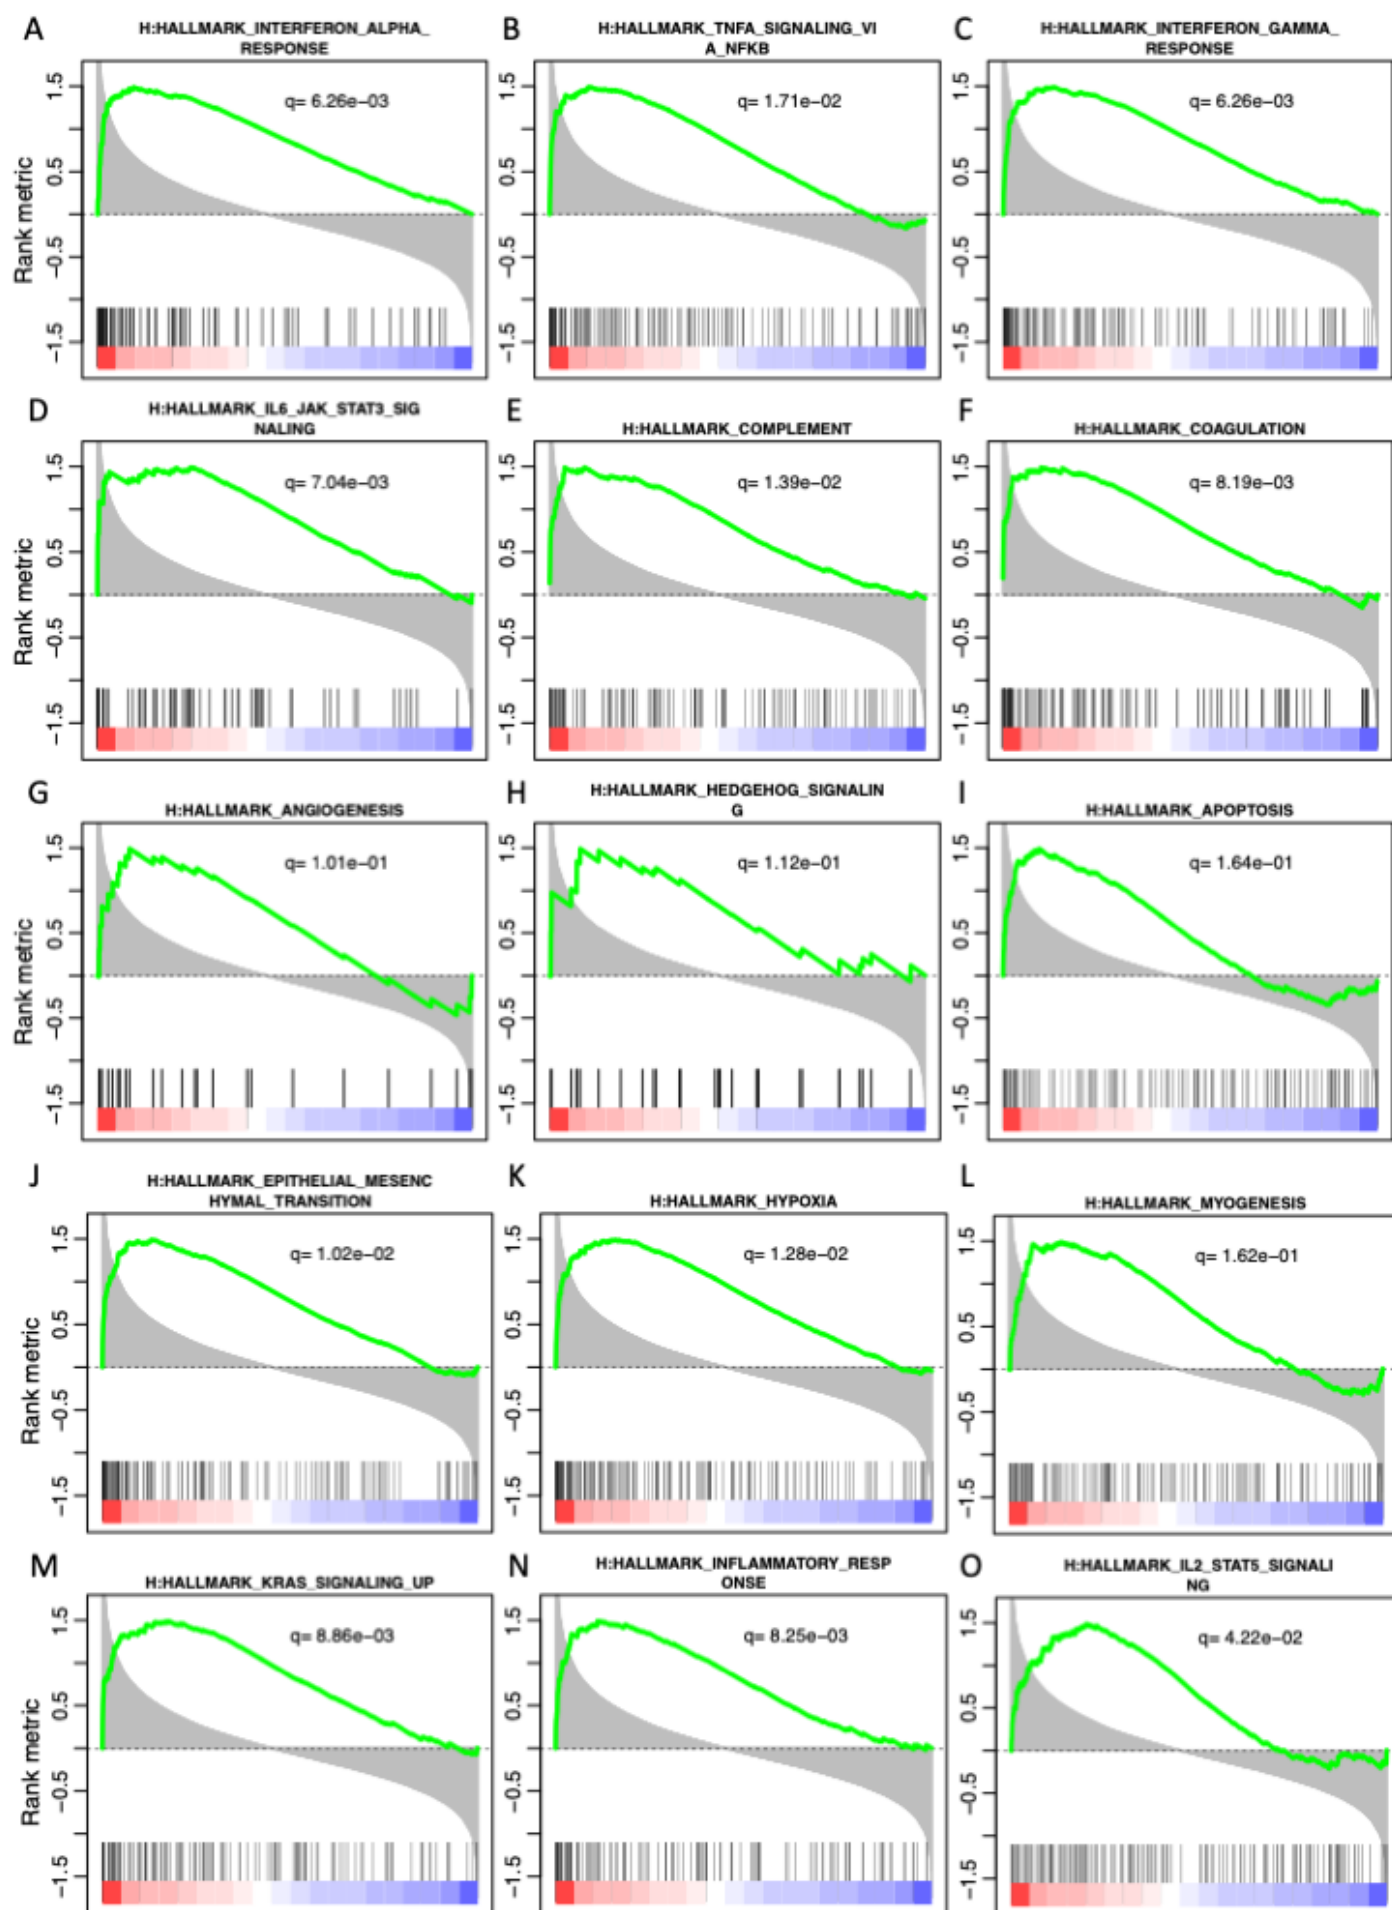

**Figure S1.** Top Enriched Gene sets for 2D vs. 3D OVCAR8. Combined panel of enrichment curves showing processes associated with cancer hallmarks. The GSEA was performed by comparing the expression profiles in the 2D and 3D cultures and highlights differential expression patterns of the genes associated with various cancer hallmarks. **(A)**, Interferon Alpha Response; **(B)**, TNF- $\alpha$  signalling; **(C)**, Interferon Gamma Response; **(D)**, IL-6-JAK-STAT3 signalling; **(E)**, Complement; **(F)**, Coagulation; **(G)**, Angiogenesis; **(H)**, Hedgehog signalling; **(I)**, Apoptosis; **(J)**, Epithelial Mesenchymal Transition; **(K)**, Hypoxia; **(L)**, Myogenesis; **(M)**, KRAS signalling; **(N)**, Inflammatory Response; **(O)**, IL-2 STAT3 signalling and. Black vertical bars represent gene rank using shorted list metric. Green curve corresponds to “running statistics” of the enrichment score (ES).

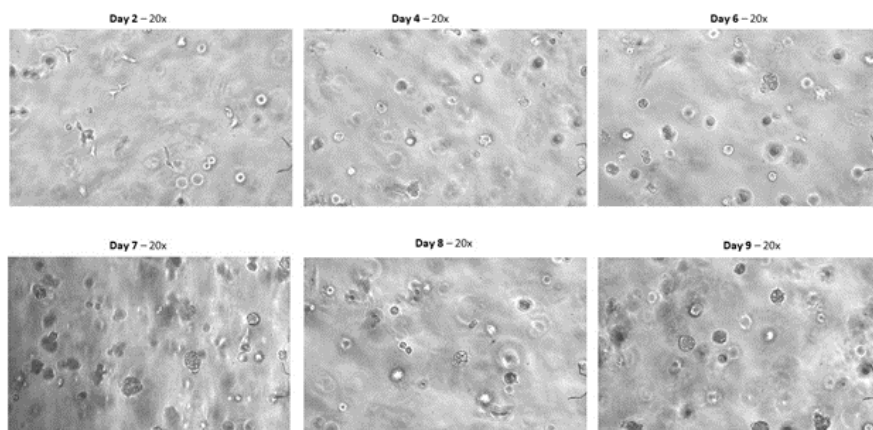

SKOV3 cells grown for 9 days in in GelTrex<sup>TM</sup>. Spheroid formation by day 6 can be seen in 3D cultures.

**Figure S2.** Growth of SKOV3 cells from Day 2 to Day 9 showing clear spheroid-like structures.
